# Supplementary material for: Dielectric anisotropy of a homochiral rare-earth metal complex
Source: Royal Society of Chemistry journal article supplement (doi:10.1039/b719580j), 2008-01-01
Supplement: b719580j.pdf [file b719580j.pdf]

## Supporting Information

**Dr. Ren-Gen Xiong**

**Ordered Matter Science Research Center**

**Southeast University, Nanjing, 210096, PRC.**

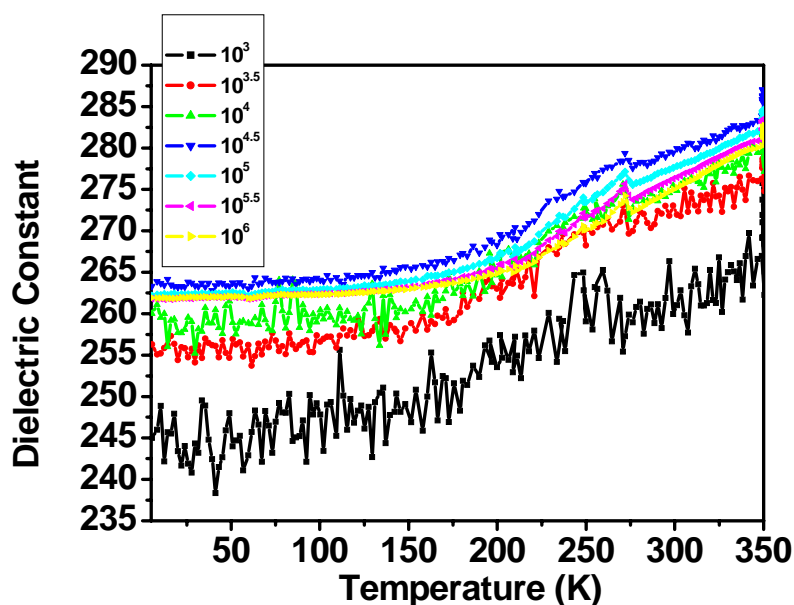

Figure S1 The permittivity of frequency-dependence about single crystal **1** measured along a-axis indicating the permittivity is basically frequency-independent within 262~280 fluctuation except lowest frequency  $10^3$  Hz which is ignored due to environment effect.

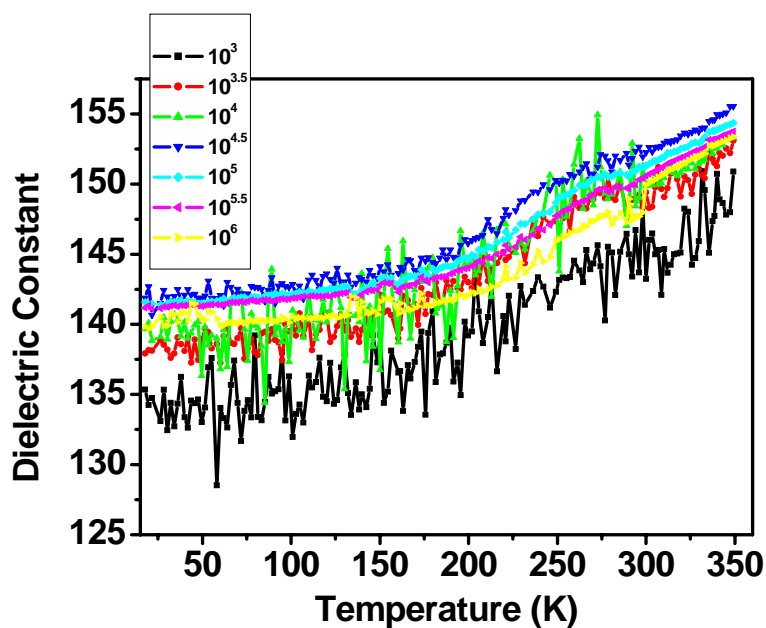

Figure S2 The permittivity of frequency-dependence about single crystal **1** measured along b-axis indicating the permittivity is basically frequency-independent within 140~152 fluctuation except lowest frequency  $10^3 \sim 10^4$  Hz which is ignored due to environment affect.

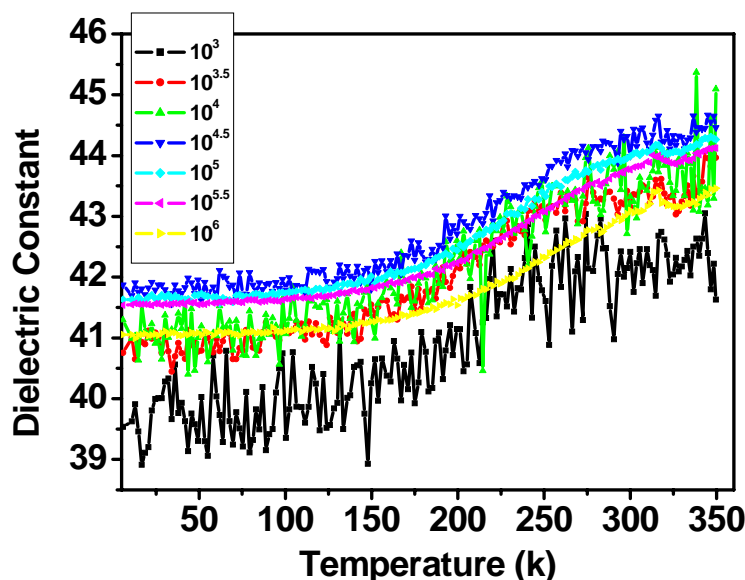

Figure S3 The permittivity of frequency-dependence about single crystal **1** measured along c-axis indicating the permittivity is basically frequency-independent within 41~45 fluctuation except lowest frequency  $10^3$  Hz which is ignored due to environment affect.
